# Supplementary material for: Tunable colors and white-light emission based on a microporous luminescent Zn(ii)-MOF
Source: Royal Society of Chemistry journal article supplement (doi:10.1039/c3dt53013b), 2013-11-26
Supplement: c3dt53013b.pdf [file c3dt53013b.pdf]

Electronic Supplementary Information (ESI)

## Tunable colors and white-light emission based on a microporous luminescent Zn(II)-MOF

Hongming He, Fuxing Sun,\* Tsolmon Borjigin, Nian Zhao and Guangshan Zhu\*  
State Key Laboratory of Inorganic Synthesis and Preparative Chemistry, Jilin University,  
Changchun, 130012, P. R. China. Fax: +86-431-85168331; Tel: +86-431-85168887; E-mail:  
zhugs@jlu.edu.cn.

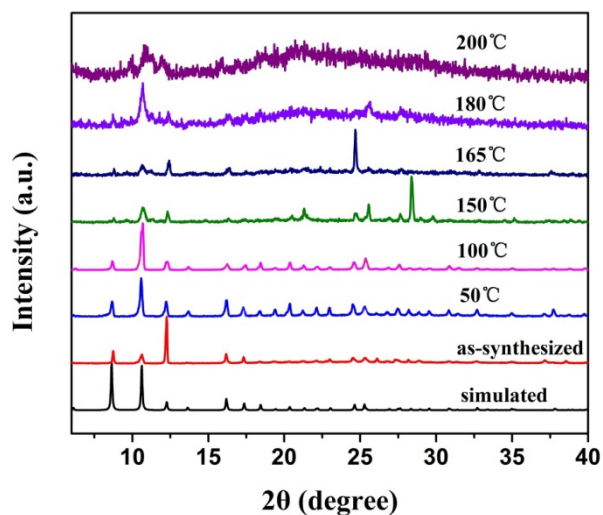

Fig. S1 The powder X-ray diffraction of JUC-113 at different temperatures.

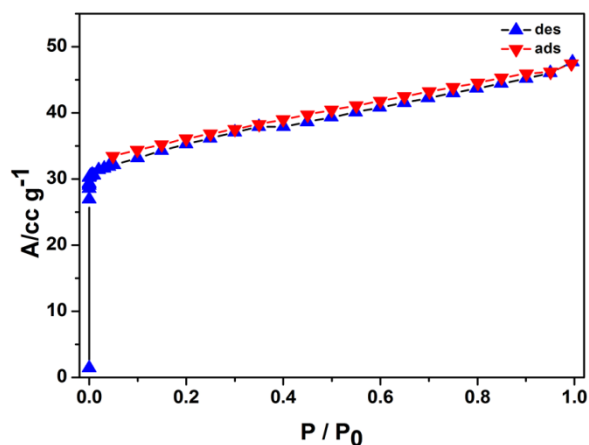

Fig. S2  $N_2$  sorption isotherms of the guest-free JUC-113 at 77 K, 1 atm.

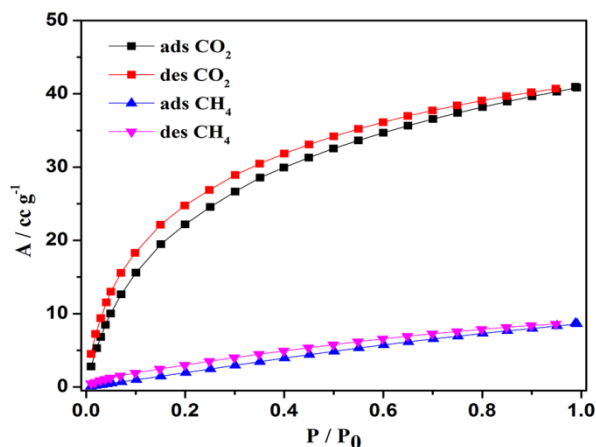

**Fig. S3** Gas sorption isotherms of the guest-free JUC-113 for CO<sub>2</sub> and CH<sub>4</sub> at 273K.

**Table S1** ICP analysis for Ln-encapsulated JUC-113

| Sample        | Element | Concentration | Ln: Zn   | Ln percent in weight |
|---------------|---------|---------------|----------|----------------------|
| JUC-113 ⊃ Tb1 | Zn      | 14.5          | 1:100.69 | /                    |
|               | Tb      | 0.144         | /        | 0.99                 |
| JUC-113 ⊃ Tb2 | Zn      | 17.6          | 1:10.43  | /                    |
|               | Tb      | 1.687         | /        | 9.59                 |
| JUC-113 ⊃ Eu1 | Zn      | 16.5          | 1:24.8   | /                    |
|               | Eu      | 0.665         | /        | 4.03                 |
| JUC-113 ⊃ Eu2 | Zn      | 15.78         | 1:16.91  | /                    |
|               | Eu      | 0.933         | /        | 5.91                 |
| JUC-113 ⊃ Ln1 | Zn      | 15.6          | 1: 24.81 | /                    |
|               | Eu      | 0.164         | 1: 95.12 | 1.05                 |
|               | Tb      | 0.244         | 1: 63.93 | 1.56                 |
| JUC-113 ⊃ Ln2 | Zn      | 15.27         | /        | /                    |
|               | Eu      | 0.576         | 1: 26.51 | 3.77                 |
|               | Tb      | 0.423         | 1: 36.10 | 2.77                 |

**Table S2** Selected bond lengths (Å) and angles (deg) for JUC-113

| bond lengths and angles |          | bond lengths and angles |          |
|-------------------------|----------|-------------------------|----------|
| Zn(1)-O(1)#1            | 2.073(3) | Zn(1)-O(1)#2            | 2.073(3) |
| Zn(1)-O(1)#3            | 2.073(3) | Zn(1)-O(1)              | 2.073(3) |
| Zn(1)-O(1)#4            | 2.073(3) | Zn(1)-O(1)#5            | 2.073(3) |

---

|                     |            |                     |           |
|---------------------|------------|---------------------|-----------|
| Zn(2)-O(2)#3        | 1.900(4)   | Zn(2)-O(2)#5        | 1.900(4)  |
| Zn(2)-O(2)          | 1.900(4)   | Zn(2)-O(4)          | 1.979(10) |
| O(1)#1-Zn(1)-O(1)#2 | 94.22(18)  | O(1)#1-Zn(1)-O(1)#3 | 87.2(2)   |
| O(1)#2-Zn(1)-O(1)#3 | 84.4(2)    | O(1)#1-Zn(1)-O(1)   | 84.4(2)   |
| O(1)#2-Zn(1)-O(1)   | 178.07(19) | O(1)#3-Zn(1)-O(1)   | 94.22(18) |
| O(1)#1-Zn(1)-O(1)#4 | 94.22(18)  | O(1)#2-Zn(1)-O(1)#4 | 94.22(18) |
| O(1)#3-Zn(1)-O(1)#4 | 178.07(19) | O(1)-Zn(1)-O(1)#4   | 87.2(2)   |
| O(1)#1-Zn(1)-O(1)#5 | 178.07(19) | O(1)#2-Zn(1)-O(1)#5 | 87.2(2)   |
| O(1)#3-Zn(1)-O(1)#5 | 94.22(18)  | O(1)-Zn(1)-O(1)#5   | 94.22(18) |
| O(1)#4-Zn(1)-O(1)#5 | 84.4(2)    | O(2)#3-Zn(2)-O(2)#5 | 117.36(7) |
| O(2)#3-Zn(2)-O(2)   | 117.35(7)  | O(2)#5-Zn(2)-O(2)   | 117.35(7) |
| O(2)#3-Zn(2)-O(4)   | 99.46(13)  | O(2)#5-Zn(2)-O(4)   | 99.46(13) |
| O(2)-Zn(2)-O(4)     | 99.46(13)  |                     |           |

Symmetry transformations used to generate equivalent atoms:

#1: -y+1, -x+1, -z+1/2; #2: x, x-y+1, -z+1/2; #3: -y+1, x-y+1, z; #4: -x+y, y, -z+1/2; #5: -x+y, -x+1, z; #6: -x+y, -x, z; #7: -y,

x-y, z.

---
